# Supplementary material for: VCAM-1 Promotes Angiogenesis of Bone Marrow Mesenchymal Stem Cells Derived from Patients with Trauma-Induced Osteonecrosis of the Femoral Head by Regulating the Apelin/CCN2 Pathway
Source: Hindawi journal article supplement (doi:10.1155/2023/6684617), 2023-10-12
Supplement: f1 [file 6684617.f1.pdf]

Differential expression analysis

| GeneSymbol | log2FC   | pvalue    | NC 1     | NC 2     | NC 3     | CD106 1  | CD106 2  | CD106 3  |
|------------|----------|-----------|----------|----------|----------|----------|----------|----------|
| LGMN       | 1.154464 | 1.68E-255 | 104.8184 | 105.0513 | 105.5073 | 218.9602 | 215.5103 | 219.3279 |
| GPR183     | 1.310479 | 0.000507  | 1.36148  | 0.647405 | 0.666628 | 2.601913 | 2.161401 | 1.567689 |
| MARCHF4    | 1.274818 | 6.49E-49  | 5.032882 | 5.814203 | 4.903289 | 12.32844 | 11.99533 | 12.04817 |
| KRT33B     | 1.611884 | 9.96E-05  | 0.498257 | 0.46348  | 0.37967  | 1.427082 | 1.447517 | 1.077385 |
| ACTL10     | 1.343928 | 8.26E-05  | 1.877156 | 1.259315 | 0.702059 | 2.968646 | 3.241404 | 2.812845 |
| GCLC       | 1.120956 | 1.24E-81  | 16.65035 | 15.6136  | 17.35627 | 33.88926 | 33.56014 | 35.08963 |
| PLPP4      | 2.016344 | 1.42E-15  | 0.415186 | 0.504861 | 0.696729 | 2.073955 | 1.950125 | 1.762214 |
| H2AC19     | 1.032868 | 1.28E-37  | 59.96858 | 62.69181 | 64.37678 | 130.7234 | 121.3562 | 112.7681 |
| SYNGR2     | 1.027254 | 2.71E-25  | 14.74149 | 13.36374 | 15.52236 | 29.40244 | 29.87997 | 25.34148 |
| HSPB1      | 1.227406 | 0         | 1990.463 | 1935.271 | 1898.323 | 4483.848 | 4322.118 | 4286.141 |
| SULT1A3    | 1.358442 | 0.000132  | 1.530857 | 1.330155 | 1.437796 | 3.312352 | 2.145178 | 3.893641 |
| SERPINA12  | 1.899176 | 0.005151  | 0.058844 | 0.089394 | 0.719656 | 1.449428 | 1.202604 | 0.718414 |
| AC112497.2 | 1.034875 | 0.000351  | 3.152972 | 4.647116 | 4.267519 | 7.629091 | 5.983707 | 10.05767 |
| FAM171A2   | 1.168255 | 2.58E-05  | 1.59062  | 1.243368 | 1.284012 | 2.185031 | 4.412941 | 2.153386 |
| KCNK6      | 1.633369 | 4.72E-188 | 10.52757 | 9.924629 | 11.10646 | 31.07072 | 31.77964 | 29.62394 |
| AC005943.1 | 2.585251 | 0.005483  | 0        | 0.1605   | 0.487107 | 2.792518 | 0.431387 | 0.544796 |
| KLF2       | 1.407839 | 2.12E-37  | 6.850315 | 6.086812 | 5.734297 | 14.12384 | 17.64855 | 15.62626 |
| NXPH3      | 1.648398 | 4.14E-28  | 1.094546 | 1.301061 | 1.293205 | 3.630367 | 4.380707 | 3.294911 |
| CLCF1      | 1.477967 | 1.33E-103 | 21.46816 | 20.3045  | 20.54597 | 54.88812 | 51.80735 | 57.82806 |
| C8orf34    | 1.200197 | 9.53E-06  | 0.81651  | 0.893507 | 0.904251 | 1.970754 | 1.924894 | 1.50855  |
| DLX5       | 1.043229 | 3.68E-08  | 3.792331 | 4.303939 | 4.984342 | 9.111587 | 6.894028 | 9.589946 |
| AC092647.1 | 1.661483 | 0.001251  | 1.897759 | 2.301113 | 1.134442 | 5.865459 | 7.007378 | 3.623117 |
| AL133346.1 | 2.453731 | 0.000218  | 1.187121 | 0.225889 | 0.256082 | 2.429034 | 4.203256 | 2.326496 |
| VGFB       | 1.711443 | 4.07E-09  | 0.860055 | 0.771482 | 0.586702 | 2.924552 | 2.286767 | 1.706527 |
| LY6K       | 1.062542 | 8.08E-38  | 19.55416 | 14.39958 | 13.44154 | 33.85929 | 33.15781 | 39.34758 |
| AC073111.2 | 3.488292 | 0.00434   | 0.119037 | 0.160442 | 0.045897 | 2.771422 | 1.038149 | 0        |
| AC037198.1 | 1.260894 | 5.91E-34  | 20.39974 | 22.21451 | 20.38348 | 44.90337 | 50.60585 | 48.57458 |
| AQP3       | 1.245932 | 0.001041  | 0.511685 | 0.84565  | 0.678757 | 1.445388 | 1.024179 | 1.535072 |
| KBTBD11-O  | 11.83464 | 0.002452  | 0        | 0        | 0        | 4.195159 | 4.066405 | 0        |
| NPTX2      | 1.079331 | 2.34E-05  | 1.33626  | 1.258084 | 1.277965 | 2.378015 | 3.589607 | 1.965366 |
| FSTL3      | 1.002315 | 3.05E-112 | 80.84367 | 80.9365  | 76.1557  | 154.9646 | 157.0962 | 142.1033 |
| AC135050.2 | 4.56618  | 2.32E-08  | 0.140797 | 1.028132 | 0.34759  | 5.787788 | 11.93299 | 12.67529 |
| DOK1       | 1.183473 | 3.77E-214 | 88.73403 | 87.10437 | 85.73126 | 184.5961 | 189.6856 | 177.7899 |
| HAPLN1     | 1.556447 | 1.59E-17  | 1.206942 | 1.056972 | 0.943198 | 2.931469 | 2.386544 | 2.953698 |
| FOXD1      | 1.203514 | 1.99E-40  | 20.15332 | 17.81336 | 16.84037 | 39.14339 | 41.6991  | 35.02168 |
| KRT34      | 1.416882 | 1.72E-24  | 6.585554 | 4.822258 | 5.005813 | 13.94312 | 14.19083 | 13.63809 |
| PRR7       | 1.015537 | 5.89E-06  | 26.17053 | 32.2075  | 22.06269 | 49.58036 | 63.84998 | 44.42338 |
| SCX        | 1.292808 | 0.006926  | 0.588978 | 1.196392 | 0.725157 | 1.114013 | 2.976529 | 1.822114 |
| RPP21      | 1.39833  | 0.006407  | 0.258828 | 3.829593 | 3.16272  | 5.76869  | 6.245282 | 7.615935 |
| AC092807.3 | 1.204276 | 4.25E-10  | 2.993932 | 3.062183 | 3.773675 | 5.782846 | 5.857682 | 6.821973 |
| MRAP2      | 1.515407 | 1.09E-41  | 7.325129 | 6.446267 | 7.362353 | 17.73837 | 18.12288 | 21.7314  |
| PRPF31     | 1.757979 | 7.78E-05  | 2.782103 | 5.465057 | 2.77813  | 16.55444 | 8.46174  | 15.44547 |
| IER3       | 1.051545 | 8.72E-08  | 4.917051 | 4.119914 | 5.937706 | 11.26669 | 11.5453  | 7.263818 |
| AC103691.1 | 2.342796 | 0.011922  | 0.263571 | 0.250208 | 0.229667 | 0.436529 | 3.195634 | 0.452155 |
| AC107223.1 | 2.063691 | 0.001979  | 0.212775 | 0.296118 | 0.208406 | 1.666731 | 0.950134 | 1.694325 |
| SOCS1      | 1.17877  | 0.000196  | 1.221905 | 1.038241 | 0.697161 | 2.438439 | 2.897731 | 2.736366 |
| ODF3L2     | 1.541334 | 0.004008  | 0.164218 | 0.441595 | 0.793188 | 1.213961 | 1.586429 | 1.211332 |
| RAMP1      | 1.367438 | 2.24E-56  | 33.0948  | 30.06561 | 35.78818 | 85.75587 | 79.77818 | 78.48806 |
| SLC43A2    | 1.436192 | 1.46E-34  | 1.63594  | 1.384557 | 1.805592 | 4.50868  | 4.223733 | 3.935894 |
| COL4A2     | 1.029803 | 5.96E-198 | 34.014   | 34.06649 | 33.06482 | 66.84331 | 65.53049 | 63.78275 |
| PAOX       | 1.128594 | 8.34E-05  | 1.218933 | 2.121776 | 1.382921 | 2.623577 | 3.151198 | 3.974769 |
| AC110611.2 | 1.161229 | 0.00345   | 0.81766  | 1.215585 | 0.740332 | 1.869208 | 2.180941 | 1.944241 |
| TUBB2BP1   | 1.012514 | 8.47E-08  | 5.442736 | 5.001083 | 5.622151 | 10.14118 | 11.27498 | 9.5386   |
| PSPN       | 1.030377 | 0.000373  | 0.601427 | 0.462422 | 0.51485  | 0.892569 | 0.971179 | 1.231967 |
| TGFBR3L    | 1.157685 | 1.99E-05  | 1.138414 | 1.651293 | 1.983275 | 2.63082  | 3.842504 | 3.124812 |
| DACT1      | 1.050596 | 7.44E-05  | 0.867005 | 0.907255 | 0.648511 | 1.503997 | 1.297348 | 2.168533 |

|            |          |           |          |          |          |          |          |          |
|------------|----------|-----------|----------|----------|----------|----------|----------|----------|
| ADAM19     | 1.107699 | 3.88E-11  | 0.895203 | 1.040373 | 1.115862 | 2.339221 | 1.965465 | 2.159399 |
| TBC1D2     | 1.308655 | 2.22E-205 | 32.20029 | 32.84547 | 30.72836 | 76.06097 | 75.56402 | 73.18418 |
| MFAP5      | 1.537782 | 1.26E-95  | 11.87686 | 10.639   | 10.44937 | 30.12437 | 29.87596 | 29.56119 |
| CES1       | 1.352804 | 2.09E-20  | 3.353262 | 3.632268 | 3.662367 | 9.283174 | 8.030728 | 8.516479 |
| KCTD4      | 1.255515 | 6.79E-09  | 1.579752 | 1.75676  | 1.678843 | 4.076663 | 3.448063 | 3.9205   |
| CLIC3      | 2.304713 | 3.31E-17  | 1.620249 | 2.210562 | 1.81909  | 10.41514 | 9.75909  | 6.78519  |
| C1QTNF5    | 1.443929 | 5.46E-07  | 3.458294 | 3.775984 | 1.432802 | 6.807823 | 8.991665 | 6.384237 |
| TUBB2A     | 1.071816 | 2.98E-162 | 165.23   | 154.2448 | 168.4705 | 405.0309 | 332.7646 | 354.0017 |
| MAP6D1     | 1.322133 | 3.60E-08  | 2.769679 | 3.915587 | 2.551882 | 4.547853 | 7.642766 | 7.033319 |
| CRLF1      | 1.145574 | 5.13E-20  | 6.714061 | 7.078652 | 5.821312 | 13.24502 | 13.45268 | 13.29797 |
| PLCE1-AS1  | 1.667984 | 0.000654  | 0.280254 | 0.257077 | 0.532648 | 1.495962 | 0.791218 | 0.976714 |
| SERINC2    | 1.36702  | 8.32E-215 | 50.67709 | 52.54016 | 48.50258 | 129.3709 | 123.3655 | 126.5472 |
| ENDOG      | 1.106496 | 1.64E-08  | 11.02124 | 8.745248 | 10.53316 | 15.53282 | 28.99183 | 17.67371 |
| AL391056.1 | 1.707046 | 2.40E-09  | 1.202609 | 1.1109   | 0.594794 | 3.08231  | 2.540785 | 2.970417 |
| CCK        | 2.746498 | 1.32E-06  | 0.143696 | 0.122413 | 0.523028 | 1.759282 | 1.809554 | 2.300413 |
| SERPINB2   | 1.542641 | 9.86E-29  | 4.027488 | 4.002106 | 5.076991 | 11.68189 | 12.43039 | 11.92832 |
| PLXDC2     | 1.076416 | 2.03E-10  | 0.538002 | 0.590849 | 0.536001 | 0.985366 | 1.155021 | 1.189896 |
| AL031777.2 | 1.9376   | 1.82E-16  | 1.996434 | 2.04145  | 1.863728 | 9.075421 | 5.502488 | 7.261677 |
| AL390726.5 | 2.412452 | 1.23E-05  | 0.4169   | 0.2322   | 0.153978 | 0.953743 | 2.194647 | 1.528253 |
| LINC00547  | 2.64195  | 2.66E-20  | 0.302185 | 0.557069 | 0.337309 | 2.309054 | 2.00245  | 2.887151 |
| TPM1       | 1.319027 | 0         | 530.5151 | 521.2827 | 543.5369 | 1272.174 | 1206.898 | 1347.916 |
| SH2D5      | 1.163138 | 1.78E-06  | 1.413765 | 0.739934 | 0.987094 | 2.489863 | 1.864009 | 1.79499  |
| EVA1B      | 1.270853 | 9.12E-35  | 68.77393 | 62.92777 | 60.35249 | 121.5232 | 172.5677 | 167.2692 |
| KIF17      | 1.343089 | 5.05E-05  | 0.37554  | 0.293345 | 0.364929 | 1.644031 | 1.356792 | 1.116932 |
| CKM        | 1.148922 | 0.008927  | 0.513387 | 0.623592 | 0.751421 | 1.995518 | 1.0824   | 0.967731 |
| VSTM2L     | 1.422656 | 4.16E-39  | 10.02136 | 8.478556 | 7.245679 | 22.72409 | 22.71587 | 19.78218 |
| NPB        | 2.191574 | 0.001156  | 0.072731 | 0.494272 | 0.200428 | 1.501702 | 0.937684 | 0.599866 |
| AC004585.1 | 1.858124 | 0.002181  | 0.46337  | 0.331002 | 0.238563 | 0.794915 | 0.985254 | 1.891734 |
| HACD1      | 1.16375  | 2.33E-52  | 17.70996 | 17.47962 | 16.59638 | 34.86167 | 38.3329  | 37.6072  |
| RASIP1     | 1.075101 | 6.44E-06  | 0.948866 | 1.279268 | 1.574557 | 2.191929 | 2.522816 | 2.187327 |
| C11orf96   | 2.193378 | 1.10E-21  | 1.735825 | 2.195378 | 2.672721 | 7.979097 | 11.93646 | 9.078921 |
| ANTKMT     | 1.235713 | 1.60E-17  | 15.11962 | 16.72747 | 11.1592  | 28.66529 | 35.75673 | 30.18006 |
| ZNF784     | 1.057074 | 1.14E-06  | 2.679335 | 2.301365 | 1.758919 | 3.820095 | 4.634781 | 5.027099 |
| COMP       | 2.183375 | 0         | 17.72672 | 17.77714 | 17.76654 | 79.04727 | 74.51059 | 76.83221 |
| CDH2       | 1.230385 | 4.38E-78  | 9.606912 | 9.982989 | 9.943829 | 21.44623 | 21.39613 | 22.97018 |
| TSPAN33    | 1.030891 | 0.000196  | 1.217747 | 1.079136 | 0.592148 | 1.996931 | 1.611622 | 1.825688 |
| IMPA2      | 1.787943 | 2.87E-51  | 7.502643 | 7.431742 | 7.609184 | 25.1225  | 21.30158 | 23.53421 |
| PDXP       | 2.029484 | 0.005397  | 2.294969 | 2.262489 | 1.729087 | 4.074415 | 16.85307 | 3.520746 |
| ZNF579     | 1.104593 | 3.88E-25  | 11.46361 | 11.58284 | 10.88369 | 20.62042 | 24.98199 | 21.20331 |
| PXDC1      | 1.199948 | 6.10E-124 | 56.58008 | 58.9193  | 52.05097 | 122.1809 | 122.9228 | 121.0503 |
| WAKMAR2    | 1.521533 | 0.001312  | 0.368862 | 1.127925 | 0.982587 | 1.34094  | 1.680641 | 1.582513 |
| CLTB       | 1.143847 | 5.90E-103 | 166.787  | 178.3755 | 171.3059 | 338.0439 | 399.8748 | 343.7302 |
| AC063952.1 | 1.127339 | 0.006523  | 1.248986 | 0.758069 | 1.618972 | 3.32299  | 2.223322 | 2.140905 |
| LINC00862  | 1.249815 | 0.007095  | 0.404296 | 0.455828 | 0.751886 | 1.659326 | 1.198388 | 0.823041 |
| AC002467.1 | 1.241078 | 0.000355  | 1.584491 | 1.820597 | 1.395662 | 4.42905  | 4.88421  | 3.243938 |
| TNFRSF10D  | 1.208267 | 4.95E-184 | 37.96805 | 39.115   | 39.70181 | 87.26169 | 86.91532 | 83.04927 |
| H2AC18     | 1.016748 | 7.93E-40  | 62.70002 | 64.17891 | 66.63289 | 131.8195 | 124.5814 | 116.8886 |
| C5orf46    | 1.059659 | 0.011142  | 1.192994 | 1.824593 | 2.875775 | 4.291502 | 3.975455 | 3.731165 |
| CD300C     | 1.969983 | 0.001924  | 0.233969 | 0.531571 | 0.071213 | 1.512047 | 0.716177 | 0.960399 |
| Z95118.2   | 1.127938 | 4.12E-17  | 4.146798 | 4.281517 | 5.002552 | 9.621675 | 9.181211 | 9.18355  |
| HSPB7      | 1.47962  | 5.80E-229 | 37.92314 | 36.84523 | 37.19946 | 99.59554 | 100.1246 | 100.2555 |
| CAMK2N2    | 1.749515 | 5.47E-06  | 0.820236 | 0.594173 | 0.395106 | 1.912032 | 2.104326 | 1.819962 |
| TM4SF20    | 1.589478 | 0.000887  | 0.207725 | 0.238727 | 0.553581 | 0.938396 | 1.387722 | 0.950918 |
| KRT7       | 2.413652 | 1.11E-37  | 2.701377 | 2.908011 | 3.837985 | 14.7889  | 13.80574 | 17.12081 |
| GNA14      | 1.24456  | 6.60E-13  | 3.262429 | 2.98478  | 4.227668 | 6.734784 | 9.281904 | 7.478467 |
| FO393400.1 | 1.446154 | 3.62E-05  | 2.128387 | 4.057213 | 2.108108 | 6.441484 | 8.282668 | 6.856724 |
| AL133476.1 | 1.970029 | 6.63E-05  | 0.530143 | 1.109    | 0.972881 | 2.480631 | 4.941724 | 2.392099 |
| ULBP2      | 1.580182 | 1.45E-26  | 9.652596 | 7.792353 | 5.986129 | 21.59939 | 21.93493 | 23.24439 |

|            |          |           |          |          |          |          |          |          |
|------------|----------|-----------|----------|----------|----------|----------|----------|----------|
| KRTAP1-1   | 1.194288 | 1.00E-13  | 6.493386 | 6.142887 | 6.185517 | 14.15954 | 13.96538 | 12.96814 |
| PRPS1      | 1.278231 | 5.12E-187 | 45.56251 | 46.70829 | 44.25671 | 104.4705 | 107.8566 | 105.2673 |
| CCDC200    | 1.341698 | 0.006283  | 1.331881 | 0.477594 | 0.904546 | 1.932688 | 3.258495 | 1.928852 |
| ATP13A2    | 1.012795 | 2.01E-120 | 25.43207 | 26.34401 | 25.6005  | 48.88936 | 49.15623 | 50.26405 |
| HSD17B14   | 1.541106 | 1.76E-05  | 0.866673 | 1.533963 | 1.116733 | 2.536581 | 4.095524 | 3.059258 |
| PSG5       | 3.076292 | 1.51E-07  | 0.593081 | 0.069046 | 0.047223 | 1.645364 | 2.326407 | 2.393288 |
| CARD9      | 1.203441 | 1.63E-07  | 1.855874 | 2.354714 | 1.363298 | 3.396775 | 5.611608 | 3.446771 |
| LINC01013  | 3.097443 | 0.014674  | 0.528336 | 0.186068 | 0        | 2.654683 | 2.027127 | 1.382606 |
| LINC00933  | 1.243986 | 0.001615  | 0.884333 | 0.445374 | 0.320056 | 1.363912 | 1.080997 | 1.434876 |
| AC138894.1 | 2.793022 | 7.99E-07  | 0.021421 | 0.33286  | 0.141585 | 1.2622   | 0.709549 | 1.198165 |
| EFHD1      | 1.645856 | 1.95E-83  | 17.56345 | 17.34086 | 13.76356 | 46.86053 | 48.68015 | 45.05068 |
| TPST2      | 1.069322 | 9.41E-132 | 18.85257 | 20.22257 | 18.77605 | 38.09754 | 36.55817 | 35.32346 |
| CDH6       | 2.197314 | 5.05E-21  | 0.370741 | 0.346527 | 0.385497 | 1.863901 | 1.320053 | 1.238295 |
| TPM1-AS    | 1.695395 | 9.90E-05  | 0.163714 | 0.609785 | 0.255283 | 1.353847 | 0.953542 | 1.201025 |
| IRS2       | 1.174555 | 1.99E-20  | 2.302526 | 1.857365 | 2.701675 | 5.111957 | 4.524802 | 5.129469 |
| CIB2       | 1.024399 | 6.65E-05  | 2.079827 | 1.893452 | 2.051368 | 3.146039 | 4.126226 | 3.593947 |
| AL590133.2 | 1.111623 | 0.012314  | 1.305372 | 2.115417 | 2.093052 | 4.586111 | 5.067349 | 1.852215 |
| TM6SF2     | 1.674146 | 1.02E-05  | 0.635662 | 0.506075 | 0.665989 | 1.56232  | 1.717663 | 2.572244 |
| AC006504.7 | 1.302845 | 0.00467   | 1.359212 | 1.899256 | 0.68877  | 2.446324 | 3.555321 | 3.366793 |
| ARC        | 1.137934 | 0.001075  | 1.032619 | 1.023722 | 0.525964 | 2.606425 | 1.632561 | 1.149513 |
| GDPD5      | 1.088078 | 4.27E-14  | 2.414849 | 2.335563 | 2.77317  | 4.945266 | 4.959023 | 5.000495 |
| AC074290.1 | 2.751753 | 0.003928  | 0        | 0.34208  | 0.180426 | 0.707547 | 0.395176 | 2.455976 |
| AP1M2      | 1.730647 | 5.79E-05  | 0.534149 | 0.488071 | 0.41245  | 1.819997 | 2.277709 | 1.427966 |
| FAM174B    | 1.564661 | 1.75E-07  | 1.041606 | 0.677743 | 0.929592 | 2.107272 | 2.333164 | 1.605636 |
| AC004967.1 | 1.359957 | 0.001637  | 2.706936 | 2.307355 | 10.22451 | 11.13555 | 14.34146 | 11.9597  |
| PODN       | 2.0704   | 2.73E-21  | 0.706086 | 0.724469 | 0.668402 | 2.612945 | 3.425207 | 3.110876 |
| TLL2       | 1.29015  | 1.04E-09  | 0.704913 | 0.467638 | 0.736188 | 1.529832 | 1.448674 | 1.72778  |
| WNK4       | 1.580172 | 1.28E-13  | 0.936021 | 0.715546 | 0.611586 | 2.516647 | 2.010859 | 2.250939 |
| HRAS       | 1.15041  | 0.000234  | 49.34702 | 43.71313 | 67.1712  | 96.13091 | 150.6765 | 93.26323 |
| LIMS2      | 2.225506 | 1.85E-70  | 4.044944 | 4.463924 | 3.514519 | 18.0691  | 19.2406  | 16.54972 |
| TRIM36     | 1.925578 | 5.42E-10  | 0.311966 | 0.546291 | 0.467025 | 1.915592 | 1.26799  | 1.633156 |
| BMPER      | 1.271753 | 1.58E-108 | 9.39331  | 9.285568 | 9.851403 | 27.60382 | 26.42909 | 22.50793 |
| LBH        | 1.100851 | 2.33E-42  | 9.79561  | 9.659297 | 9.134277 | 18.31701 | 19.79271 | 20.14161 |
| DNLZ       | 1.428317 | 0.000103  | 3.363014 | 3.709367 | 3.124991 | 6.108411 | 13.30471 | 6.794725 |
| NCF2       | 1.733735 | 5.21E-05  | 0.416403 | 0.181179 | 0.577416 | 1.507057 | 2.000077 | 1.785268 |
| HSPB8      | 1.029564 | 3.42E-19  | 8.198202 | 8.690028 | 9.646729 | 17.86253 | 18.24082 | 15.54753 |
| ESM1       | 1.118119 | 1.95E-07  | 2.541921 | 2.327167 | 2.800365 | 4.087569 | 4.674007 | 6.591395 |
| C11orf52   | 2.122627 | 0.00021   | 0.518001 | 0.509731 | 0.925844 | 3.35351  | 3.05855  | 0.838864 |
| SPHK1      | 1.757471 | 4.98E-264 | 38.44232 | 38.44574 | 38.90365 | 122.6523 | 129.7975 | 119.0402 |
| CD36       | 1.087766 | 9.13E-29  | 7.391709 | 6.852867 | 5.912307 | 11.8435  | 10.91638 | 13.24736 |
| NXN        | 1.137116 | 7.43E-60  | 11.97746 | 11.5497  | 12.43926 | 24.51498 | 24.54266 | 26.01997 |
| ATP1B1     | 1.52246  | 1.96E-76  | 11.9528  | 10.15341 | 10.69282 | 29.60511 | 29.44373 | 30.91077 |
| PGF        | 1.102365 | 2.57E-76  | 37.99908 | 38.80039 | 41.73856 | 84.25362 | 79.98837 | 79.31052 |
| INO80B-WBI | 8.752233 | 0.005962  | 0        | 0.000001 | 0        | 0        | 6.048986 | 0.785829 |
| CST6       | 1.217577 | 1.83E-09  | 6.404011 | 5.739285 | 7.327637 | 14.79654 | 13.3506  | 15.09942 |
| HIC1       | 1.040787 | 6.82E-42  | 6.114241 | 5.909037 | 5.181953 | 9.956372 | 10.49965 | 11.36219 |
| SERTAD1    | 1.043723 | 1.14E-41  | 19.19667 | 17.97684 | 18.50675 | 39.75793 | 35.27325 | 34.3627  |
| COBLL1     | 1.233217 | 8.52E-09  | 0.412117 | 0.819833 | 0.420556 | 1.345318 | 1.310745 | 1.340619 |
| DBNDD2     | 1.148846 | 2.39E-08  | 4.524866 | 3.089335 | 4.259951 | 8.966187 | 7.270708 | 9.051363 |
| EPB41L4B   | 1.449985 | 2.48E-12  | 0.755123 | 0.913565 | 0.781859 | 2.256548 | 1.92548  | 2.201036 |
| RASSF7     | 1.53134  | 0.000306  | 1.157366 | 0.27911  | 1.164795 | 2.630045 | 1.915689 | 1.278109 |
| HOXD-AS2   | 1.360881 | 2.94E-05  | 2.258159 | 2.146218 | 1.585687 | 3.124153 | 5.99256  | 5.651125 |
| CNN1       | 1.278135 | 7.08E-17  | 5.427047 | 4.989326 | 7.16431  | 13.34028 | 15.28245 | 12.73536 |
| GPRC5C     | 1.096937 | 0.001335  | 0.892642 | 0.565955 | 0.878007 | 1.488811 | 1.123498 | 1.650228 |
| BATF3      | 1.215285 | 0.002349  | 1.702667 | 1.045683 | 1.296227 | 2.369148 | 5.23449  | 2.049504 |
| UCP2       | 2.060604 | 0.00051   | 0.119879 | 0.379933 | 0.194379 | 1.026095 | 0.640162 | 1.494506 |
| AC138028.6 | 1.243445 | 0.003697  | 0.698179 | 0.931948 | 0.508951 | 1.125567 | 1.409315 | 2.315785 |
| NDUFAF8    | 1.018483 | 3.94E-09  | 126.5199 | 143.5439 | 107.136  | 214.6511 | 283.8888 | 231.9027 |

|             |          |           |          |          |          |          |          |          |
|-------------|----------|-----------|----------|----------|----------|----------|----------|----------|
| AC093536.1  | 1.963215 | 2.68E-06  | 1.906627 | 1.667096 | 0.770538 | 4.109729 | 6.792505 | 5.358141 |
| LRRC73      | 1.211886 | 6.36E-05  | 0.741873 | 0.900743 | 0.662462 | 1.593542 | 1.768759 | 1.753132 |
| FGF14       | 1.388924 | 0.005453  | 2.573161 | 2.169173 | 2.337025 | 10.15208 | 4.158363 | 3.346621 |
| NT5DC3      | 1.250363 | 2.24E-65  | 4.026181 | 4.166293 | 4.342278 | 9.146077 | 9.5158   | 9.767095 |
| PPP1R14A    | 2.926264 | 5.50E-72  | 6.471835 | 4.274156 | 5.035012 | 37.74732 | 35.37854 | 37.49141 |
| KRT10       | 1.367808 | 4.12E-21  | 8.650121 | 9.65315  | 8.378706 | 17.71487 | 28.33015 | 19.64415 |
| FBXL16      | 1.650253 | 1.39E-07  | 0.675278 | 0.368672 | 0.690376 | 2.074027 | 1.993084 | 1.516284 |
| ATP1A3      | 1.619832 | 9.77E-09  | 0.396131 | 0.462527 | 0.558352 | 1.223693 | 1.359115 | 1.798272 |
| PTH1R       | 1.107695 | 2.59E-06  | 1.309571 | 2.036818 | 2.343361 | 4.144051 | 3.691625 | 4.177347 |
| OR7E38P     | 2.191147 | 2.77E-10  | 4.031658 | 1.781264 | 1.126758 | 7.760647 | 13.22303 | 9.20281  |
| GPAT2       | 1.031556 | 2.19E-09  | 2.104513 | 1.808608 | 2.225246 | 4.256862 | 3.8396   | 4.121015 |
| PMEPA1      | 1.221324 | 8.26E-20  | 2.691157 | 2.697176 | 2.009402 | 5.42409  | 5.875319 | 5.400334 |
| KRT14       | 2.695903 | 2.21E-15  | 0.292969 | 0.506152 | 0.553419 | 2.606556 | 2.817769 | 3.203719 |
| KRTAP2-2    | 1.477646 | 6.56E-05  | 1.118392 | 1.44129  | 1.219723 | 3.263693 | 3.359198 | 3.496396 |
| AL357518.1  | 3.543522 | 0.002711  | 0.360571 | 0        | 0        | 1.428093 | 0.655511 | 1.989553 |
| BAMBI       | 1.128398 | 4.99E-11  | 4.584962 | 4.570424 | 5.133794 | 8.106168 | 12.19932 | 9.602843 |
| HAPLN3      | 1.051073 | 4.74E-23  | 7.406384 | 8.455555 | 8.251668 | 14.7025  | 15.79045 | 17.45327 |
| AC016831.1  | 1.308797 | 5.20E-10  | 1.210389 | 1.281026 | 1.9787   | 3.792145 | 2.62183  | 3.696977 |
| KRTAP2-4    | 1.635211 | 1.29E-08  | 2.052797 | 1.681295 | 2.074237 | 5.362524 | 5.711615 | 6.205196 |
| COL4A1      | 1.043303 | 1.46E-121 | 17.10272 | 16.76985 | 17.10729 | 31.85257 | 34.00306 | 34.17321 |
| NPAS1       | 1.810848 | 1.94E-121 | 18.84903 | 16.67966 | 17.44018 | 56.7114  | 62.34863 | 54.8792  |
| SNX22       | 5.189591 | 3.60E-05  | 0.070069 | 0.16101  | 0.152777 | 0.160397 | 6.990337 | 6.694936 |
| KISS1       | 3.775672 | 3.19E-16  | 0.296319 | 0.308674 | 0.450935 | 3.989796 | 6.941709 | 3.810789 |
| SCARF2      | 1.389382 | 2.18E-96  | 16.75125 | 17.46211 | 15.19875 | 40.55024 | 42.91944 | 38.75407 |
| C8G         | 1.540181 | 0.01689   | 0.473422 | 0.54552  | 0.428712 | 0.717883 | 2.009448 | 1.777591 |
| CADM3       | 1.061877 | 1.46E-08  | 2.282728 | 1.584778 | 1.496872 | 3.709321 | 3.757636 | 3.206546 |
| HBEGF       | 1.185529 | 2.32E-34  | 10.40565 | 10.53519 | 9.040658 | 22.38608 | 19.53377 | 22.98924 |
| CSRNP1      | 1.177409 | 9.01E-21  | 4.012349 | 3.334487 | 3.572317 | 8.469336 | 7.597039 | 7.436128 |
| FAM180A     | 1.043423 | 1.22E-21  | 16.53257 | 18.11535 | 13.90439 | 26.46543 | 33.04265 | 29.95924 |
| CCL26       | 1.445445 | 0.000141  | 1.818406 | 2.559698 | 1.439541 | 4.412103 | 5.189957 | 5.217773 |
| IL18        | 1.155593 | 0.001544  | 1.468923 | 1.675588 | 0.86581  | 3.885304 | 2.954684 | 2.369927 |
| ANGPTL4     | 1.06016  | 0         | 406.5255 | 396.17   | 394.5275 | 811.2063 | 789.7592 | 778.6105 |
| MUC12-AS1   | 1.262574 | 0.00338   | 1.584156 | 2.526067 | 3.421908 | 5.82233  | 6.910429 | 4.62666  |
| NGF         | 1.559774 | 1.42E-10  | 1.760652 | 2.372138 | 2.232457 | 6.504351 | 7.694665 | 5.34643  |
| MGST2       | 1.035382 | 1.91E-07  | 5.329476 | 5.351008 | 5.927304 | 9.64424  | 10.11117 | 10.36007 |
| ADCY4       | 1.351313 | 5.03E-11  | 2.338235 | 1.193551 | 2.278616 | 4.772899 | 3.749532 | 3.767661 |
| AC092042.3  | 1.951415 | 0.012834  | 0        | 0.862469 | 0.776156 | 1.124685 | 1.984836 | 3.085022 |
| IQCJ-SCHIP1 | 1.547089 | 4.08E-37  | 6.227741 | 6.094089 | 5.858514 | 12.55079 | 14.04685 | 12.49672 |
| AC124852.1  | 1.244548 | 5.75E-05  | 1.074817 | 0.7113   | 0.919984 | 2.075452 | 2.490069 | 2.304774 |
| RGCC        | 1.192512 | 2.95E-08  | 8.586002 | 7.904281 | 10.97102 | 14.97345 | 27.84872 | 16.6041  |
| OSCAR       | 1.208204 | 0.000968  | 0.468989 | 0.602618 | 0.816216 | 1.520724 | 2.481565 | 2.089306 |
| PDE2A-AS2   | 2.434404 | 0.002089  | 0.279724 | 0.353588 | 0.095888 | 1.620691 | 0.488964 | 1.96946  |
| SERPINA9    | 1.614275 | 2.35E-06  | 0.51053  | 1.129993 | 1.140151 | 2.639543 | 3.196768 | 2.151688 |
| MEGF6       | 1.790783 | 8.24E-124 | 4.697698 | 4.259709 | 4.078003 | 14.76226 | 15.30696 | 14.25421 |
| TSPAN13     | 1.361254 | 3.43E-40  | 10.25678 | 9.068324 | 9.781068 | 21.46584 | 23.71403 | 26.10792 |
| C4orf48     | 2.179754 | 3.89E-11  | 41.77633 | 36.69719 | 20.53826 | 138.1807 | 179.4891 | 115.9295 |
| NEK7        | 1.216579 | 1.33E-149 | 40.41145 | 39.81798 | 38.5193  | 81.14948 | 89.48062 | 92.40389 |
| FAM110A     | 1.16319  | 1.66E-10  | 4.265939 | 3.375314 | 3.005771 | 7.251968 | 8.697483 | 6.709392 |
| DUSP2       | 1.820574 | 1.99E-05  | 0.295655 | 0.461036 | 0.456114 | 1.613192 | 1.101089 | 1.597797 |
| AC024592.3  | 1.18717  | 0.00022   | 6.849757 | 5.204228 | 2.658888 | 8.816747 | 6.13554  | 11.44561 |
| CCN2        | 1.207522 | 0         | 334.4407 | 318.3728 | 313.4325 | 675.7723 | 737.4382 | 713.3289 |
| PRELP       | 1.759252 | 3.60E-17  | 0.447445 | 0.486382 | 0.486111 | 1.605718 | 1.606289 | 1.38091  |
| ACTA2       | 1.25382  | 0         | 576.7881 | 609.306  | 594.3441 | 1315.456 | 1303.152 | 1334.949 |
| ADRA2C      | 2.264085 | 1.38E-20  | 0.904541 | 1.51519  | 0.825362 | 5.177039 | 4.428809 | 5.384899 |
| SPINT2      | 2.045181 | 4.79E-09  | 0.543391 | 0.866149 | 0.813635 | 3.092007 | 4.038128 | 1.845094 |
| AC013652.1  | 1.013346 | 0.000494  | 1.234189 | 1.86421  | 1.956753 | 2.739667 | 3.680538 | 2.831045 |
| BCL7A       | 1.093115 | 3.51E-10  | 1.387693 | 1.146229 | 1.309635 | 2.468159 | 2.362782 | 2.860354 |
| FST         | 1.820817 | 0         | 71.95318 | 70.76162 | 67.16303 | 227.7318 | 232.2775 | 241.0368 |

|            |          |           |          |          |          |          |          |          |
|------------|----------|-----------|----------|----------|----------|----------|----------|----------|
| FOXC2-AS1  | 1.066146 | 0.000163  | 5.761863 | 7.432398 | 5.774474 | 12.43858 | 11.89229 | 13.66332 |
| KRTAP2-1   | 1.546849 | 2.57E-05  | 1.129037 | 1.312517 | 1.126214 | 3.81424  | 2.929634 | 3.388716 |
| HYI        | 1.950904 | 2.79E-11  | 1.346671 | 1.403964 | 1.268779 | 4.813273 | 6.922811 | 3.459464 |
| HS3ST2     | 1.717892 | 6.70E-11  | 0.663382 | 0.970388 | 0.712494 | 2.502651 | 2.535333 | 2.371685 |
| NRG1       | 1.136954 | 2.61E-16  | 7.640741 | 4.607584 | 4.714736 | 14.99128 | 20.94198 | 12.32018 |
| ELN        | 2.347304 | 3.71E-73  | 2.286319 | 1.74653  | 2.395484 | 9.336047 | 10.26007 | 8.678118 |
| RBM24      | 1.084774 | 3.82E-07  | 1.950537 | 1.257001 | 1.622589 | 3.307358 | 3.230677 | 3.104964 |
| AL135925.1 | 1.040071 | 0.00033   | 1.268647 | 1.145997 | 1.099616 | 1.868479 | 2.454096 | 2.580519 |
| HES1       | 1.551537 | 1.81E-07  | 0.914811 | 1.11289  | 1.124965 | 3.279637 | 2.89466  | 2.542288 |
| EGR2       | 1.459493 | 2.26E-09  | 1.156891 | 0.805176 | 0.743974 | 2.434194 | 2.341848 | 2.090304 |
| MSX1       | 1.426275 | 1.04E-27  | 5.493173 | 4.95655  | 5.026613 | 11.92496 | 15.09391 | 12.9517  |
| AL137186.2 | 1.247023 | 0.002262  | 0.206091 | 0.800366 | 0.897485 | 2.94702  | 1.310979 | 1.947571 |
| PKMYT1     | 1.419601 | 4.88E-17  | 3.647853 | 2.937513 | 3.101865 | 7.163073 | 9.4277   | 10.18252 |
| CDT1       | 1.178952 | 2.31E-11  | 2.641492 | 2.561448 | 2.326849 | 5.628344 | 5.740493 | 4.19426  |
| ANKRD1     | 1.779243 | 5.93E-244 | 38.00285 | 35.1377  | 39.33646 | 118.4275 | 126.4263 | 123.1197 |
| AC107214.1 | 1.071245 | 0.009209  | 1.436817 | 0.764234 | 0.852655 | 1.943797 | 3.634994 | 1.62749  |
| AUNIP      | 1.092196 | 0.012569  | 0.248007 | 0.784551 | 0.921562 | 1.090488 | 1.422436 | 1.507084 |
| TAFA5      | 2.254081 | 4.18E-09  | 0.431295 | 0.323399 | 0.20817  | 2.037266 | 1.375134 | 1.064598 |
| KRT16      | 3.756981 | 1.45E-08  | 0        | 0.369158 | 0.134213 | 0.982164 | 1.412923 | 1.694211 |
| ABHD17AP6  | 1.436462 | 0.007482  | 0.6894   | 0.225298 | 0.625055 | 1.545058 | 1.31667  | 1.219551 |
| NUDT8      | 1.038057 | 0.002611  | 1.749755 | 2.615036 | 3.773138 | 3.87796  | 5.076799 | 7.729578 |
| AC006538.2 | 1.131037 | 0.002273  | 1.872092 | 2.175711 | 3.218198 | 6.16456  | 5.066314 | 4.08417  |
| GABBR2     | 2.483885 | 4.12E-41  | 0.410449 | 0.551897 | 0.588562 | 2.858079 | 2.753746 | 2.63796  |
| TUBB2B     | 1.10383  | 1.87E-114 | 52.71972 | 52.45236 | 49.1414  | 58.44634 | 94.78807 | 72.13512 |
| AC034223.2 | 1.053463 | 0.013044  | 3.826694 | 2.434487 | 1.819019 | 5.867615 | 3.604953 | 6.479038 |
| LINC01711  | 1.247476 | 0.000306  | 1.675838 | 1.020933 | 1.727998 | 2.757707 | 3.564101 | 3.712777 |
| CCDC81     | 1.005961 | 2.34E-07  | 3.374447 | 4.189334 | 4.444061 | 8.631032 | 6.832956 | 5.85252  |
| SAC3D1     | 1.336091 | 2.64E-17  | 5.038879 | 4.759313 | 4.611343 | 10.48785 | 13.63261 | 11.26805 |
| P2RX5      | 1.426539 | 1.97E-15  | 2.879614 | 4.820663 | 3.57809  | 10.06929 | 10.13434 | 9.228436 |
| ATP10A     | 1.0379   | 3.42E-29  | 4.74743  | 4.51472  | 4.125097 | 8.386897 | 8.205144 | 9.167174 |
| DLX2       | 1.164846 | 0.000926  | 0.573499 | 0.643766 | 0.405169 | 1.077581 | 1.224638 | 1.030003 |
| AP001107.3 | 1.083943 | 0.004709  | 1.769467 | 1.794887 | 3.247869 | 4.940583 | 4.309482 | 4.651122 |
| GAL        | 2.244593 | 0.0041    | 0        | 0.466641 | 0.698406 | 1.043347 | 2.332345 | 2.026868 |
| SLPI       | 1.250884 | 0.009819  | 1.210552 | 2.832723 | 1.201217 | 2.025978 | 4.887194 | 5.101274 |
| AC026356.1 | 1.03181  | 0.011227  | 0.794709 | 0.834337 | 0.528112 | 1.322997 | 1.379526 | 1.533812 |
| TSPAN18    | 1.155592 | 5.58E-10  | 2.985542 | 2.149986 | 2.810718 | 4.440852 | 5.292121 | 7.022195 |
| PLAAT1     | 1.505134 | 0.000364  | 0.764188 | 0.795986 | 0.745323 | 1.499521 | 2.250015 | 2.794392 |
| OXTR       | 1.974488 | 1.76E-24  | 0.80727  | 0.925646 | 1.221561 | 3.721136 | 3.722224 | 3.188697 |
| IL7R       | 1.094287 | 5.37E-31  | 5.120779 | 5.614883 | 5.700808 | 9.851834 | 11.47744 | 11.34267 |
| AC109479.1 | 1.058404 | 0.015905  | 2.867013 | 1.34896  | 1.143837 | 4.041743 | 3.92015  | 2.72609  |
| CRYAB      | 1.561367 | 5.41E-303 | 124.879  | 155.5831 | 116.4794 | 420.2161 | 430.5326 | 454.9485 |
| KIAA0040   | 2.312262 | 7.54E-18  | 0.390409 | 0.332674 | 0.245629 | 1.304323 | 1.740888 | 1.580645 |
| AC110792.4 | 1.935039 | 9.71E-10  | 0.304368 | 0.465041 | 0.486301 | 1.596846 | 1.355672 | 1.648915 |
| INAFM1     | 1.165965 | 3.28E-31  | 21.48549 | 19.14149 | 18.93144 | 42.00301 | 44.17211 | 41.19049 |
| GAD1       | 1.197385 | 2.22E-05  | 0.598103 | 0.60948  | 0.464849 | 1.393759 | 1.465721 | 1.159533 |
| POPDC2     | 1.06921  | 0.001699  | 0.735842 | 1.209958 | 0.879244 | 1.632699 | 1.770705 | 2.302696 |
| CTU1       | 1.49792  | 1.07E-15  | 3.590226 | 2.702882 | 2.200685 | 7.18711  | 8.614555 | 7.075646 |
| KRT18      | 1.046355 | 6.42E-10  | 4.997036 | 4.334398 | 4.004702 | 9.375601 | 7.776269 | 8.893106 |
| MMP23B     | 1.03422  | 0.007391  | 1.450582 | 1.556648 | 1.149878 | 2.203815 | 3.988339 | 2.526931 |
| IGFBP3     | 1.878882 | 0         | 369.4818 | 358.0906 | 359.9958 | 1236.596 | 1259.368 | 1227.664 |
| BMP6       | 1.677762 | 1.95E-110 | 6.165086 | 6.040525 | 6.224366 | 19.4715  | 18.16677 | 18.57767 |
| KRTAP2-3   | 1.604529 | 1.86E-63  | 18.56749 | 17.76099 | 15.93726 | 49.62223 | 51.27161 | 50.58239 |
| CITED4     | 1.446993 | 5.95E-19  | 12.89991 | 12.01216 | 8.069204 | 23.74133 | 34.4149  | 27.50879 |
| TMEM51     | 1.138732 | 2.28E-08  | 2.03647  | 1.898856 | 2.135281 | 3.803221 | 4.379853 | 4.29565  |
| PDF        | 1.023197 | 1.04E-11  | 4.158204 | 4.334245 | 3.311715 | 6.788857 | 8.847119 | 7.220557 |
| WFDC1      | 1.197506 | 2.20E-20  | 7.936054 | 7.65636  | 6.539908 | 15.92946 | 18.6721  | 17.3318  |
| DGKI       | 1.16994  | 6.42E-16  | 0.683379 | 1.365713 | 1.315067 | 2.218152 | 1.700646 | 2.514335 |
| AL031058.1 | 1.367123 | 1.07E-07  | 2.473036 | 2.133129 | 2.553511 | 5.261955 | 6.227465 | 6.156254 |

|            |           |           |          |          |          |          |          |          |
|------------|-----------|-----------|----------|----------|----------|----------|----------|----------|
| LYPD6B     | 1.527947  | 6.45E-08  | 1.605088 | 2.036881 | 1.206124 | 3.997545 | 5.12625  | 3.58186  |
| SPDL1      | 1.025389  | 1.74E-46  | 16.94966 | 18.71701 | 17.30891 | 34.59425 | 31.80235 | 34.98499 |
| HSPB2      | 1.14584   | 4.88E-31  | 21.51208 | 20.37003 | 21.27684 | 47.13004 | 41.16266 | 44.94597 |
| AC099066.2 | 1.157577  | 1.68E-10  | 5.172915 | 5.564105 | 6.331421 | 11.89838 | 14.15389 | 9.943305 |
| RAD51      | 1.220454  | 1.13E-08  | 1.697171 | 2.078774 | 1.611706 | 4.498435 | 3.375902 | 4.096942 |
| NELFE      | 1.235134  | 2.52E-22  | 9.331059 | 14.16326 | 13.63107 | 34.05222 | 26.00305 | 34.74596 |
| EDN1       | 2.403241  | 4.26E-53  | 3.2476   | 2.78264  | 2.061238 | 12.64018 | 13.36197 | 14.81626 |
| NAP1L2     | 1.110025  | 3.94E-07  | 1.609294 | 1.309072 | 1.387246 | 2.58261  | 3.428377 | 2.851093 |
| CTXN1      | 1.053018  | 8.71E-08  | 6.082662 | 6.74013  | 6.142626 | 9.705133 | 16.64648 | 11.22346 |
| CHCHD10    | 2.13981   | 3.00E-09  | 13.45773 | 11.9476  | 12.6857  | 38.63719 | 79.58337 | 39.31307 |
| CALHM6     | 1.731056  | 0.000363  | 0.417835 | 0.477513 | 0.487507 | 1.992119 | 1.043199 | 1.511636 |
| TAMALIN    | 1.628471  | 0.00059   | 0.439512 | 0.429419 | 0.226849 | 1.639235 | 1.127817 | 1.25411  |
| IGFBP1     | 1.064031  | 1.55E-13  | 6.239703 | 7.352821 | 5.697206 | 12.09259 | 12.3346  | 14.04934 |
| VLDLR-AS1  | 1.29726   | 0.000826  | 0.408774 | 0.32606  | 0.971438 | 1.707886 | 1.566089 | 1.554712 |
| SHISA9     | 1.253018  | 1.71E-06  | 0.507323 | 0.520115 | 0.417027 | 1.206816 | 0.766137 | 1.174292 |
| VCAM1      | 1.012026  | 3.19E-135 | 67.15425 | 62.47563 | 69.2712  | 125.6482 | 126.968  | 129.645  |
| MMP3       | 1.153856  | 0.008324  | 0.345567 | 0.739252 | 1.474047 | 2.087788 | 1.947252 | 1.447367 |
| NR4A2      | -1.073172 | 0.00283   | 0.681922 | 1.220659 | 1.103959 | 0.453509 | 0.522174 | 0.345589 |
| ALG1L6P    | -1.301537 | 0.006945  | 2.502461 | 1.779796 | 1.667894 | 0.673532 | 0.832124 | 0.747118 |
| LAMA5      | -1.530257 | 2.19E-58  | 9.7032   | 10.14582 | 9.060545 | 3.598033 | 3.349337 | 2.917261 |
| FMNL2      | -1.304306 | 2.54E-34  | 7.116781 | 7.079219 | 7.133754 | 2.386988 | 2.993815 | 2.805864 |
| CLIC4P3    | -1.811632 | 0.000124  | 2.662445 | 2.896766 | 2.001231 | 0.906504 | 0.593069 | 0.53898  |
| FAM20A     | -2.26884  | 1.31E-41  | 4.352582 | 3.841893 | 3.844952 | 0.77635  | 0.719552 | 0.799926 |
| CFAP69     | -1.382197 | 0.000108  | 1.042905 | 1.832102 | 1.491017 | 0.256713 | 0.830997 | 0.697412 |
| PAN2       | -1.081872 | 2.36E-08  | 3.497202 | 3.66255  | 3.169441 | 2.022693 | 2.768536 | 1.926692 |
| FADS2      | -1.448252 | 2.79E-219 | 84.63409 | 85.34663 | 78.4927  | 30.4917  | 28.3353  | 27.45691 |
| TNFSF15    | -1.085707 | 6.64E-17  | 3.566546 | 3.448227 | 3.13652  | 1.396167 | 1.649395 | 1.468889 |
| IGF2BP3    | -1.125652 | 4.95E-13  | 5.943697 | 7.084783 | 6.756183 | 3.005958 | 2.472722 | 3.064785 |
| PBX1       | -1.16418  | 1.55E-06  | 1.518561 | 1.103727 | 1.825824 | 0.404161 | 0.961375 | 0.605281 |
| CFAP126    | -1.126728 | 0.004028  | 3.093175 | 2.581246 | 2.617438 | 1.279339 | 1.284888 | 1.026145 |
| TRIM52     | -2.1941   | 6.98E-33  | 4.768572 | 3.581579 | 4.412117 | 1.015131 | 0.857442 | 0.720016 |
| COL6A3     | -1.186109 | 0         | 1063.386 | 1053.795 | 1023.585 | 442.8373 | 426.8762 | 438.6505 |
| PIGCP1     | -1.086128 | 0.003201  | 3.914889 | 3.496751 | 3.093412 | 1.110494 | 2.292385 | 1.285578 |
| ZNF608     | -1.084643 | 4.52E-09  | 1.885365 | 2.710387 | 1.76087  | 0.808295 | 1.69109  | 1.788247 |
| PDE4DIPP2  | -1.387593 | 5.33E-50  | 9.447245 | 9.147229 | 8.79771  | 2.908798 | 2.82937  | 3.14155  |
| AC055811.4 | -1.667623 | 0.000347  | 1.949875 | 0.855187 | 1.640931 | 0.653612 | 0.260545 | 0.407471 |
| RPL32P3    | -1.595638 | 5.03E-11  | 2.818415 | 2.642325 | 2.72807  | 0.724167 | 1.15416  | 0.895624 |
| RBBP4P1    | -1.455117 | 0.00899   | 1.363921 | 0.951267 | 1.512535 | 0.564078 | 0.149272 | 0.58615  |
| SEMA6D     | -1.118724 | 3.87E-05  | 1.370776 | 0.848984 | 1.155415 | 0.389073 | 0.346153 | 0.59045  |
| NFE2L3     | -1.290128 | 1.04E-25  | 8.23913  | 6.781681 | 7.77868  | 2.711897 | 3.145475 | 2.919383 |
| PLAAT4     | -1.387101 | 1.66E-22  | 25.57892 | 23.02917 | 22.6363  | 8.841117 | 8.434226 | 8.41618  |
| CRABP2     | -1.059897 | 2.33E-44  | 75.7878  | 73.34434 | 68.71211 | 34.96223 | 32.86189 | 31.80684 |
| WASH5P     | -1.079068 | 0.00743   | 1.023276 | 1.308883 | 0.679841 | 0.479497 | 0.787303 | 0.487829 |
| MTATP8P1   | -3.605469 | 1.17E-07  | 8.785306 | 3.03817  | 23.70346 | 0.750421 | 0.807403 | 1.01776  |
| LINC00342  | -1.01676  | 2.97E-07  | 2.837718 | 2.945926 | 3.086527 | 1.498857 | 1.249587 | 2.177534 |
| SLC1A3     | -1.031746 | 3.51E-09  | 3.761571 | 3.464721 | 3.639341 | 1.633219 | 1.590925 | 1.687384 |
| PDE7B      | -1.088638 | 1.79E-29  | 7.816706 | 7.564956 | 6.996738 | 3.103087 | 3.376405 | 3.421515 |
| SAXO2      | -1.214812 | 0.009289  | 1.474418 | 1.267132 | 1.117173 | 0.308576 | 0.504639 | 0.254282 |
| ATG16L2    | -1.724001 | 6.80E-17  | 7.959708 | 5.549235 | 6.470154 | 1.917407 | 1.140882 | 2.084475 |
| PAPPA2     | -1.026012 | 9.70E-39  | 5.940723 | 5.92219  | 6.250195 | 2.73543  | 2.935506 | 2.801915 |
| AC079949.1 | -2.233589 | 0.000418  | 0.45747  | 5.204355 | 0.501098 | 0.885632 | 0.069501 | 0.103348 |
| SV2A       | -2.334634 | 5.78E-24  | 2.41527  | 2.441845 | 2.7181   | 0.604167 | 0.370604 | 0.422046 |
| AF201337.1 | -1.320726 | 0.005819  | 1.855085 | 1.855703 | 2.767859 | 0.689328 | 0.765258 | 1.025553 |
| MT-ND4L    | -1.022531 | 7.00E-190 | 5727.911 | 6061.287 | 5881.794 | 2758.311 | 2625.121 | 2909.645 |
| LINC02057  | -1.192786 | 0.012007  | 2.318654 | 2.634126 | 1.438543 | 0.895186 | 0.691933 | 0.863645 |
| GRIA1      | -1.332451 | 7.73E-11  | 2.483612 | 1.958363 | 2.992285 | 0.846132 | 1.096462 | 0.924659 |
| AC013451.2 | -1.750512 | 0.002101  | 1.514457 | 2.149559 | 1.572759 | 0.512405 | 0.467604 | 0.438723 |
| OAS1       | -1.289234 | 6.31E-10  | 4.646823 | 3.752046 | 4.206265 | 2.354012 | 1.72791  | 1.214904 |

|            |           |           |          |          |          |          |          |          |
|------------|-----------|-----------|----------|----------|----------|----------|----------|----------|
| APOBEC3D   | -1.098667 | 1.10E-05  | 2.314112 | 2.211108 | 2.491726 | 0.837946 | 1.169035 | 0.944471 |
| NLRC5      | -1.015177 | 8.60E-22  | 16.34899 | 13.75336 | 13.8017  | 11.07006 | 8.041949 | 6.092352 |
| ITPR1      | -1.284587 | 2.05E-12  | 2.684232 | 3.371575 | 2.701759 | 1.490832 | 0.856388 | 2.204662 |
| SAMHD1     | -1.092451 | 2.35E-39  | 15.95655 | 15.14086 | 14.70025 | 7.199932 | 5.929917 | 7.166686 |
| SMG1P1     | -1.091565 | 0.006351  | 2.039352 | 1.086677 | 0.947901 | 0.324248 | 0.563717 | 0.4859   |
| CCL13      | -1.179589 | 1.13E-05  | 6.223515 | 7.357884 | 5.949936 | 3.238228 | 2.774379 | 2.171834 |
| ERV3-1     | -1.051964 | 8.59E-06  | 2.534968 | 3.987948 | 3.433985 | 1.492006 | 2.00138  | 1.782229 |
| CD74       | -1.022985 | 1.46E-109 | 153.7226 | 152.688  | 136.2721 | 67.52358 | 62.64562 | 65.50102 |
| BDKRB2     | -1.218523 | 2.27E-22  | 7.477731 | 7.241728 | 8.758337 | 3.841443 | 3.32974  | 1.838475 |
| OGT        | -1.212475 | 2.09E-129 | 28.77296 | 28.97567 | 27.31775 | 12.4714  | 11.70889 | 12.58616 |
| RMRP       | -1.548074 | 0.002317  | 7.594936 | 4.865911 | 21.42582 | 4.509152 | 2.94657  | 3.415761 |
| RPPH1      | -1.833    | 0.0164    | 2.80125  | 0.718036 | 9.30367  | 0.776664 | 0.83143  | 1.734851 |
| ADAM33     | -1.585271 | 2.24E-10  | 2.795721 | 2.707214 | 2.20831  | 0.897594 | 0.599473 | 0.648188 |
| BORA       | -1.007455 | 0.00258   | 0.962549 | 1.034375 | 1.562081 | 0.524744 | 0.640128 | 0.532988 |
| HR         | -1.653728 | 6.36E-15  | 1.939096 | 1.751776 | 1.884363 | 0.476628 | 0.768369 | 0.507285 |
| C1RL       | -1.509351 | 8.35E-46  | 12.21532 | 12.98965 | 12.52419 | 4.688118 | 4.246404 | 4.069692 |
| SEMA3A     | -1.466889 | 1.57E-21  | 3.084515 | 4.392798 | 3.963529 | 1.623924 | 0.989811 | 1.473137 |
| RBM26-AS1  | -1.165541 | 0.002545  | 1.60196  | 0.639795 | 1.243074 | 0.397378 | 0.691197 | 0.186894 |
| TATDN2P2   | -1.130042 | 0.012125  | 1.235469 | 0.900247 | 1.05148  | 0.650522 | 0.527934 | 0.204861 |
| ITGA8      | -1.139867 | 3.65E-05  | 1.16646  | 1.078161 | 1.001808 | 0.363151 | 0.763445 | 0.354667 |
| ABCA1      | -1.533623 | 2.31E-35  | 3.725533 | 4.055747 | 4.172588 | 1.110264 | 1.541478 | 1.275797 |
| ZNF841     | -1.196469 | 2.11E-15  | 7.100673 | 5.888816 | 5.462208 | 1.953673 | 3.011015 | 2.202355 |
| ETV1       | -1.155233 | 6.26E-20  | 6.812159 | 7.769726 | 7.835388 | 2.351538 | 3.629101 | 3.484771 |
| GNG12-AS1  | -1.284616 | 0.003059  | 2.803896 | 1.793414 | 1.440999 | 0.311199 | 0.683771 | 0.446189 |
| PHC1       | -1.222168 | 1.30E-18  | 4.350574 | 4.756704 | 5.385974 | 2.196825 | 1.730241 | 1.81252  |
| COLEC12    | -2.400429 | 1.03E-19  | 1.808609 | 1.24643  | 1.2416   | 0.261352 | 0.22518  | 0.276773 |
| AL135999.1 | -1.092452 | 1.76E-06  | 3.297558 | 4.451718 | 2.736935 | 1.811323 | 1.682465 | 1.181608 |
| EREG       | -1.167788 | 5.89E-16  | 4.739731 | 5.793908 | 5.254065 | 2.044145 | 2.541554 | 1.963109 |
| HERC2P7    | -1.468271 | 0.005707  | 2.712939 | 1.641028 | 1.610103 | 0.538219 | 1.414384 | 0.642936 |
| PARP9      | -1.032431 | 7.07E-18  | 12.96367 | 12.40065 | 15.31662 | 5.434261 | 5.13348  | 7.53553  |
| C16orf86   | -1.267409 | 0.000566  | 1.376897 | 2.740493 | 2.604407 | 1.133407 | 0.856413 | 0.761295 |
| FADS1      | -2.09288  | 0         | 57.06151 | 57.19734 | 57.87702 | 11.80359 | 13.2426  | 13.47973 |
| TMCC1-AS1  | -1.101539 | 7.36E-05  | 1.366485 | 1.331594 | 1.783762 | 0.633605 | 0.538768 | 0.94081  |
| LDLR       | -1.279413 | 3.04E-92  | 31.7699  | 33.51084 | 33.47034 | 11.1647  | 11.72955 | 13.00576 |
| INTS6L     | -1.194432 | 2.44E-05  | 1.289109 | 1.249421 | 1.820077 | 0.743317 | 0.515083 | 0.495183 |
| LSP1       | -1.374776 | 6.02E-18  | 8.890187 | 8.435939 | 7.310502 | 2.763781 | 3.337367 | 3.135726 |
| ANGPTL2    | -1.589819 | 1.57E-36  | 8.290825 | 7.870633 | 7.848144 | 2.445821 | 2.52564  | 2.515073 |
| SLC35E2A   | -1.408359 | 2.42E-06  | 3.263659 | 3.854266 | 2.488156 | 1.296899 | 1.101599 | 0.691662 |
| AC006058.4 | -1.619958 | 5.29E-18  | 8.783349 | 9.558028 | 8.304752 | 2.19794  | 3.400548 | 2.661556 |
| PARP14     | -1.09222  | 4.06E-34  | 6.274458 | 6.773336 | 6.415446 | 3.079599 | 2.711524 | 2.869742 |
| FAM86C2P   | -1.353862 | 0.0014    | 1.6738   | 2.118694 | 2.251205 | 0.296503 | 1.006909 | 1.137587 |
| RGS17      | -1.092872 | 2.50E-07  | 1.008586 | 1.123096 | 0.95355  | 0.531147 | 0.411416 | 0.430173 |
| THSD4      | -1.070799 | 4.26E-45  | 11.46414 | 12.52393 | 12.17739 | 4.905788 | 5.419389 | 6.018462 |
| PKD1P4     | -1.238464 | 1.25E-23  | 5.944785 | 5.921243 | 5.693528 | 3.246067 | 1.826568 | 2.178583 |
| AL133243.2 | -1.478512 | 0.001518  | 1.859651 | 1.236452 | 0.790027 | 0.337726 | 0.539768 | 0.431808 |
| RN7SL4P    | -1.55796  | 0.016755  | 2.883912 | 2.210583 | 4.739069 | 1.407407 | 0.621918 | 1.076041 |
| IFITM1     | -1.337664 | 4.08E-141 | 236.3807 | 222.8467 | 237.8749 | 91.55357 | 96.4072  | 88.96491 |
| FP236383.4 | -1.146588 | 0.000115  | 1159.313 | 1339.965 | 2131.467 | 742.1406 | 632.1463 | 622.249  |
| AC004890.2 | -1.321884 | 7.26E-07  | 4.181506 | 3.103171 | 4.528963 | 1.279165 | 1.70021  | 1.877348 |
| LINC00106  | -2.700151 | 0.000516  | 1.790474 | 2.094708 | 2.590493 | 0.352064 | 0.229106 | 0.244965 |
| DPP4       | -1.245233 | 7.90E-14  | 3.504494 | 2.752416 | 3.41571  | 0.761863 | 0.747392 | 0.793719 |
| TBCE       | -1.70979  | 0.000105  | 1.929955 | 2.163261 | 2.129358 | 0.213225 | 0.442845 | 1.10472  |
| MAT2A      | -1.050386 | 1.01E-174 | 150.3665 | 148.4252 | 148.1281 | 63.11224 | 66.1689  | 67.76247 |
| CEP126     | -1.001622 | 4.67E-08  | 1.575651 | 1.559197 | 1.381933 | 0.745759 | 0.767769 | 0.619506 |
| PPL        | -3.028038 | 1.94E-274 | 13.8545  | 15.03904 | 13.28245 | 1.622218 | 1.634918 | 1.734912 |
| DMTF1      | -1.046672 | 3.98E-21  | 13.06272 | 14.07339 | 12.60277 | 6.656766 | 5.750267 | 7.073354 |
| RPARP-AS1  | -1.497494 | 1.18E-06  | 3.819781 | 3.514606 | 2.087923 | 0.882472 | 0.695652 | 1.145383 |
| AC026316.2 | -5.965667 | 0.000696  | 1.457941 | 0.708301 | 1.099038 | 0        | 0        | 0        |

|            |           |           |          |          |          |          |          |          |
|------------|-----------|-----------|----------|----------|----------|----------|----------|----------|
| RN7SL1     | -1.195063 | 0.010742  | 43.61008 | 51.11129 | 117.2985 | 33.38958 | 29.30911 | 25.61541 |
| NEAT1      | -1.376914 | 0         | 52.34847 | 56.87014 | 58.79575 | 24.23051 | 30.33218 | 12.67376 |
| MAP2       | -1.397308 | 8.84E-13  | 1.980456 | 2.036374 | 2.794941 | 0.571275 | 0.658429 | 0.719449 |
| AL691432.1 | -2.098057 | 3.35E-05  | 1.671872 | 1.66994  | 2.074017 | 0.367139 | 0.253642 | 0.544008 |
| C3         | -1.729164 | 3.62E-14  | 1.853157 | 1.812094 | 1.759064 | 0.393839 | 0.519075 | 0.654719 |
| STEAP4     | -3.646274 | 0         | 37.84013 | 38.49237 | 39.84678 | 2.886322 | 3.053854 | 2.945544 |
| SAP30-DT   | -1.273054 | 0.000125  | 4.017231 | 4.117408 | 3.198687 | 1.638102 | 0.915634 | 1.377126 |
| TGFB3      | -1.224673 | 3.27E-27  | 9.756076 | 8.730069 | 8.926619 | 3.40594  | 3.75778  | 3.844882 |
| LINC00943  | -1.898915 | 5.44E-08  | 1.807335 | 1.471231 | 2.236427 | 0.579917 | 0.570083 | 0.328109 |
| SULT1B1    | -1.196839 | 2.10E-17  | 3.571353 | 4.488547 | 4.417706 | 1.286555 | 1.38519  | 1.496036 |
| SEC31B     | -1.193513 | 1.43E-06  | 1.718457 | 1.939759 | 1.776557 | 0.575815 | 0.589169 | 1.117709 |
| GABRE      | -1.239623 | 1.58E-17  | 4.941033 | 4.680898 | 4.53166  | 1.861067 | 1.715173 | 1.627871 |
| OLFML1     | -1.690493 | 9.85E-52  | 19.83603 | 18.07286 | 15.5345  | 5.625872 | 4.879337 | 5.539491 |
| HMCN1      | -1.028457 | 2.07E-15  | 1.294385 | 1.255448 | 1.146703 | 0.515651 | 0.561384 | 0.517745 |
| CCDC18-AS1 | -1.985527 | 3.04E-13  | 3.359358 | 4.246449 | 3.016855 | 1.147031 | 1.426954 | 1.170088 |
| TRIM9      | -1.258026 | 4.69E-05  | 1.640121 | 1.344792 | 0.880976 | 0.359587 | 0.487195 | 0.620267 |
| CHI3L2     | -1.452219 | 2.20E-08  | 6.035747 | 5.548882 | 9.096463 | 2.935976 | 1.563909 | 2.816947 |
| NTSR1      | -1.252833 | 3.28E-14  | 5.265121 | 6.141325 | 5.447428 | 2.815233 | 2.14535  | 1.770768 |
| ZNF788P    | -1.613213 | 0.000932  | 1.857637 | 1.43812  | 2.240529 | 1.077431 | 0.461616 | 0.325101 |
| APOL1      | -1.074608 | 6.28E-97  | 58.09941 | 58.32953 | 57.18555 | 25.66982 | 27.5553  | 25.98169 |
| H2BC19P    | -1.170353 | 1.56E-05  | 1.197305 | 1.220881 | 1.474537 | 0.681608 | 0.584919 | 0.653506 |
| CFI        | -3.416276 | 0.017624  | 2.874787 | 3.161642 | 5.10865  | 0.378954 | 0.459691 | 0        |
| IFIT3      | -1.259286 | 5.79E-58  | 24.40124 | 23.12222 | 21.84427 | 8.494024 | 8.591345 | 9.801459 |
| GALNT15    | -1.43972  | 1.01E-27  | 5.896709 | 7.405518 | 6.47234  | 2.657989 | 2.430084 | 2.562403 |
| EPSTI1     | -1.004797 | 1.50E-25  | 16.68047 | 14.62732 | 16.91339 | 7.413612 | 7.714088 | 8.393173 |
| RFX8       | -1.08759  | 6.44E-13  | 9.423514 | 8.903318 | 8.521209 | 4.773535 | 3.533243 | 4.390797 |
| RN7SK      | -1.301375 | 0.000147  | 17.07145 | 13.76493 | 39.38783 | 9.922336 | 7.31727  | 9.922235 |
| SCAND2P    | -1.024338 | 8.32E-07  | 2.58783  | 2.56406  | 1.788717 | 0.750341 | 0.959992 | 1.149244 |
| LINC00106  | -2.536279 | 0.000411  | 1.941665 | 2.773862 | 3.143269 | 0.580359 | 0.229136 | 0.278258 |
| CASP1      | -1.078921 | 4.57E-05  | 3.435021 | 3.393154 | 2.236835 | 1.391181 | 1.187785 | 1.712077 |
| AC092683.1 | -1.145439 | 1.06E-09  | 5.98948  | 5.469696 | 5.218134 | 2.077044 | 2.442057 | 2.762231 |
| ARHGAP26   | -1.059876 | 7.47E-11  | 2.061116 | 1.807604 | 1.875497 | 1.026381 | 1.168232 | 0.762128 |
| BTN3A3     | -1.115311 | 1.08E-21  | 15.81196 | 17.36745 | 18.49328 | 7.948624 | 5.931811 | 8.096258 |
| PSMB8      | -1.099644 | 2.96E-07  | 13.14443 | 8.724192 | 11.3172  | 4.049519 | 5.953512 | 4.559698 |
| CRYBG1     | -1.032152 | 8.90E-90  | 19.53718 | 19.65618 | 19.37267 | 9.515079 | 8.449652 | 9.049143 |
| ZNF354B    | -1.045989 | 1.03E-05  | 4.035356 | 3.46566  | 3.473897 | 1.374029 | 2.240862 | 2.293654 |
| CCL7       | -1.918855 | 3.98E-05  | 3.79915  | 2.551782 | 3.978031 | 0.363462 | 0.922064 | 1.320546 |
| ZNF436-AS1 | -1.138794 | 0.003785  | 1.387123 | 2.021445 | 1.403026 | 0.976457 | 0.345817 | 0.958094 |
| AL355032.1 | -1.011006 | 3.00E-16  | 122.4699 | 116.8473 | 117.5219 | 69.09486 | 54.31848 | 45.18363 |
| TMEM178A   | -1.411086 | 0.000137  | 2.047795 | 1.584901 | 1.389867 | 0.644577 | 0.57636  | 0.572191 |
| AC108010.1 | -3.402503 | 3.33E-17  | 2.482324 | 2.943209 | 3.666037 | 0.418178 | 0.235065 | 0.146533 |
| RNF213     | -1.130736 | 5.95E-109 | 13.56651 | 9.683216 | 11.81023 | 4.671955 | 8.047079 | 8.348992 |
| IGFBP5     | -2.106644 | 0         | 427.3391 | 431.3367 | 420.2294 | 94.07947 | 95.97454 | 93.02414 |
| MTSS1      | -1.261945 | 4.96E-139 | 33.81285 | 32.14381 | 32.63297 | 13.25191 | 12.76301 | 13.27737 |
| PDPK2P     | -1.28809  | 2.94E-05  | 1.572856 | 1.769381 | 1.358321 | 0.683983 | 0.539815 | 0.5897   |
| TMEM147-A  | -1.251959 | 4.69E-07  | 2.725919 | 2.430684 | 2.109312 | 0.827077 | 1.341002 | 0.698039 |
| NID1       | -1.104918 | 6.28E-228 | 70.61306 | 69.07199 | 67.65096 | 30.44113 | 30.1814  | 31.39425 |
| EIF2S3B    | -1.054368 | 0.001052  | 3.12968  | 3.182968 | 2.082271 | 1.464855 | 1.525237 | 0.842207 |
| CA9        | -1.089501 | 3.06E-08  | 6.064091 | 5.112475 | 6.065847 | 2.556559 | 2.710818 | 2.428727 |
| FLT3LG     | -1.084597 | 2.87E-06  | 7.976079 | 10.14946 | 8.032842 | 5.01399  | 3.596602 | 2.942857 |
| DIO2       | -1.132721 | 6.97E-05  | 1.535541 | 0.982298 | 1.010565 | 1.019136 | 0.54209  | 0.363439 |
| MALAT1     | -1.195388 | 5.19E-19  | 30.90463 | 32.98475 | 40.20961 | 15.11448 | 15.54311 | 14.28307 |
| OLFML2A    | -1.075021 | 5.09E-50  | 13.70099 | 12.34624 | 11.39379 | 5.871446 | 5.645918 | 5.379311 |
| ZNF559-ZNF | -1.572274 | 3.80E-05  | 1.283547 | 1.904875 | 1.273825 | 0.329308 | 0.597845 | 0.541182 |
| IFIT2      | -1.207652 | 1.25E-14  | 4.752791 | 4.411334 | 4.88166  | 1.90866  | 1.768542 | 2.185012 |
| CD14       | -1.0788   | 0.001128  | 3.189538 | 2.219634 | 2.546435 | 1.094702 | 1.655955 | 0.851226 |
| SLC6A15    | -1.432937 | 8.55E-12  | 3.275474 | 3.187882 | 2.917279 | 1.399983 | 1.170199 | 0.755922 |
| KRT19      | -1.667349 | 6.63E-92  | 47.69409 | 46.00752 | 44.06353 | 14.29035 | 13.65911 | 13.05247 |



|            |           |           |          |          |          |          |          |          |
|------------|-----------|-----------|----------|----------|----------|----------|----------|----------|
| PKIB       | -1.394385 | 3.27E-08  | 5.842163 | 6.138466 | 6.760097 | 2.496646 | 2.891187 | 2.034337 |
| FAXDC2     | -1.393644 | 5.27E-12  | 3.656295 | 3.759387 | 4.204658 | 1.32956  | 1.010057 | 1.535625 |
| XIST       | -1.150961 | 1.89E-60  | 14.63637 | 10.8871  | 10.75105 | 7.285508 | 4.869539 | 5.766761 |
| AL360181.3 | -1.507838 | 0.001856  | 0.983352 | 0.653653 | 2.185025 | 0.534199 | 0.470915 | 0.308139 |
| NFAT5      | -1.152179 | 1.65E-14  | 2.801418 | 4.713687 | 4.07693  | 1.437846 | 1.841267 | 1.752941 |
| ZSCAN12    | -1.365631 | 2.79E-06  | 1.227593 | 1.4762   | 0.848726 | 0.27099  | 0.433496 | 0.381583 |
| IFIH1      | -1.432899 | 2.07E-07  | 1.601972 | 1.962785 | 2.449682 | 0.683737 | 0.563425 | 0.864999 |
| GABPB1-AS1 | -1.07371  | 1.09E-07  | 2.2459   | 1.843254 | 2.155537 | 2.212607 | 1.59713  | 1.460501 |
| SHPRH      | -1.132336 | 9.06E-07  | 1.184863 | 1.184116 | 0.833038 | 0.488864 | 0.447532 | 0.354665 |
| XAF1       | -2.077548 | 0.012058  | 12.9351  | 11.60775 | 12.87999 | 5.36355  | 0.602504 | 2.231128 |
| BTN3A1     | -1.077291 | 5.04E-15  | 6.762236 | 8.740749 | 7.763164 | 3.503124 | 3.087486 | 3.921529 |
| APOL3      | -1.070196 | 2.53E-21  | 22.96004 | 24.07163 | 17.97083 | 9.213626 | 8.643774 | 9.78999  |
| AL355607.2 | -1.362328 | 7.72E-08  | 7.634314 | 7.948564 | 5.533465 | 2.259907 | 2.394832 | 3.155976 |
| DYNC2H1    | -1.061966 | 9.85E-27  | 3.529228 | 3.850636 | 3.365673 | 2.243675 | 1.660214 | 1.777139 |
| AL096711.2 | -1.066187 | 2.61E-09  | 4.315398 | 5.004983 | 2.240121 | 0.991731 | 1.116629 | 0.958303 |
| PPFIA4     | -1.159503 | 2.49E-29  | 10.76959 | 10.07835 | 10.37223 | 3.567884 | 3.5772   | 2.923712 |
| AC007192.1 | -4.067047 | 5.87E-19  | 30.62786 | 16.60832 | 10.99331 | 1.284552 | 1.153285 | 0.849578 |
| PLA2G4A    | -1.390554 | 1.17E-12  | 3.610109 | 4.385327 | 3.946826 | 1.267124 | 1.339046 | 1.729851 |
| ALDH3A2    | -1.061913 | 7.58E-88  | 35.83059 | 36.35764 | 35.17026 | 15.31204 | 16.97746 | 16.4163  |
| AEBP1      | -1.659432 | 8.89E-69  | 11.34847 | 11.48912 | 11.72587 | 3.432642 | 3.743541 | 3.619429 |
| FP236383.5 | -1.138585 | 0.000658  | 1161.056 | 1334.406 | 2254.877 | 791.0832 | 640.9121 | 627.7267 |
| SOD2       | -1.063125 | 1.98E-130 | 61.71835 | 80.24098 | 64.58168 | 37.20661 | 34.19416 | 34.6824  |
| AC006486.1 | -1.467713 | 0.013984  | 2.28213  | 2.526277 | 1.625987 | 1.343119 | 0.45133  | 0.373555 |
| ADAMTSL4   | -1.5729   | 4.12E-42  | 11.51516 | 11.32952 | 12.92082 | 3.636289 | 4.335692 | 3.26079  |
| DNAH1      | -1.064399 | 5.07E-08  | 1.692016 | 0.711204 | 1.061838 | 0.472225 | 0.69251  | 0.377285 |
| PRKX       | -1.006376 | 1.04E-09  | 3.987932 | 4.156514 | 4.971793 | 1.68713  | 2.089399 | 2.309479 |
| ANKRD10-II | -2.923213 | 9.60E-06  | 1.303545 | 1.394924 | 2.496151 | 0.290876 | 0.063796 | 0.250108 |
| SEMA5A     | -1.02175  | 1.22E-41  | 7.988256 | 7.392756 | 7.545502 | 3.460299 | 3.228137 | 3.804666 |
| LDB2       | -1.362399 | 0.000837  | 1.126815 | 1.795407 | 2.164986 | 0.366405 | 0.567684 | 0.939085 |
| PCCA       | -1.006828 | 7.23E-10  | 5.152466 | 4.854769 | 5.283628 | 2.697406 | 2.325398 | 2.479095 |
| FER1L4     | -1.285184 | 3.01E-45  | 17.6574  | 16.27901 | 14.69622 | 5.898157 | 7.410594 | 6.334859 |
| ZNF731P    | -1.268991 | 8.45E-07  | 8.899942 | 5.846657 | 9.641328 | 2.953713 | 2.163437 | 4.816086 |
| SMARCA5-A  | -2.539475 | 0.000355  | 0.82706  | 1.421711 | 1.100375 | 0.29784  | 0.153267 | 0.080924 |
| GPC6       | -1.133722 | 1.11E-14  | 3.342628 | 2.961044 | 3.4258   | 1.274076 | 1.272335 | 1.689919 |
| HERC6      | -1.202868 | 2.31E-18  | 6.235258 | 5.442507 | 5.92889  | 2.19445  | 2.281252 | 2.736081 |
| IL18R1     | -1.109226 | 0.000931  | 1.368802 | 0.852943 | 1.143301 | 0.283594 | 0.616416 | 0.488199 |
| POU6F1     | -1.092773 | 3.16E-06  | 1.815963 | 1.73421  | 1.327792 | 0.589508 | 0.734271 | 0.531901 |
| CD302      | -1.055512 | 2.25E-08  | 3.319956 | 3.734423 | 2.666974 | 1.314632 | 1.445366 | 1.702405 |
| GRTP1      | -1.06306  | 1.90E-06  | 4.316447 | 5.661703 | 4.483789 | 2.177083 | 2.188621 | 2.053988 |
| BX255923.1 | -1.477852 | 0.015221  | 3.645474 | 1.30793  | 1.418496 | 0.556952 | 1.082871 | 0.626422 |
| C1R        | -1.940062 | 5.06E-114 | 35.99147 | 30.51312 | 33.04945 | 7.427123 | 8.364137 | 8.150741 |
| SPATA6     | -1.054534 | 1.84E-06  | 1.763395 | 1.912409 | 1.579163 | 0.773093 | 0.599788 | 0.782854 |
| COL21A1    | -1.515732 | 3.37E-22  | 4.096635 | 3.916379 | 4.292655 | 1.268297 | 1.827709 | 1.295475 |
| MOXD1      | -1.934292 | 1.96E-119 | 28.90222 | 31.41847 | 32.65504 | 8.438357 | 7.283    | 7.442807 |
| HLTF       | -1.828602 | 7.56E-32  | 5.442931 | 7.347409 | 5.928931 | 2.247827 | 1.513408 | 2.105256 |
| MME        | -1.375129 | 2.25E-158 | 40.36329 | 38.67839 | 39.31284 | 14.70234 | 14.45602 | 14.55611 |
| HERC2P9    | -1.597986 | 7.20E-12  | 3.702748 | 3.084467 | 2.194118 | 1.096642 | 0.897993 | 0.83253  |
| PAPLN      | -1.082186 | 2.45E-09  | 2.071025 | 2.172226 | 2.331837 | 0.855523 | 1.144097 | 0.786189 |
| S100A4     | -1.085934 | 2.62E-30  | 140.4159 | 129.5173 | 153.4404 | 61.99741 | 70.91493 | 55.58875 |
| AC018647.2 | -1.171024 | 2.79E-08  | 1.905348 | 1.672176 | 1.756091 | 0.775122 | 0.726397 | 0.747552 |
| KYNU       | -1.520469 | 1.54E-37  | 3.646335 | 4.189208 | 2.902257 | 0.809289 | 0.674122 | 0.807462 |
| TSC22D1-AS | -1.041004 | 0.001958  | 1.913566 | 1.124175 | 1.262951 | 0.653059 | 0.356137 | 0.618528 |
| C1S        | -1.007496 | 6.04E-98  | 66.76514 | 64.65735 | 66.20419 | 30.38495 | 31.37369 | 29.57362 |
| PDE9A      | -1.143377 | 3.50E-11  | 7.28456  | 7.810915 | 6.50212  | 2.986775 | 2.865351 | 3.793313 |
| CNTNAP1    | -1.154644 | 1.87E-55  | 23.4084  | 27.85601 | 24.28214 | 10.4978  | 9.993046 | 11.30564 |
| GOLGA8A    | -1.588757 | 5.09E-61  | 12.68577 | 12.34619 | 10.41088 | 3.521803 | 3.084047 | 3.781652 |
| LINC01615  | -1.077694 | 0.004594  | 3.449281 | 2.788454 | 1.735171 | 1.314618 | 0.943208 | 0.932237 |
| PRG4       | -1.082843 | 2.16E-20  | 5.567024 | 5.794394 | 6.24743  | 2.495704 | 2.615458 | 2.287509 |

|            |           |           |          |          |          |          |          |          |
|------------|-----------|-----------|----------|----------|----------|----------|----------|----------|
| LINC00944  | -1.357499 | 1.27E-08  | 7.178883 | 7.776543 | 8.006966 | 3.590157 | 1.818884 | 2.756572 |
| DDX60      | -1.633214 | 4.14E-17  | 2.229323 | 2.604394 | 2.309499 | 0.86157  | 0.73696  | 0.580693 |
| AC009053.1 | -1.203286 | 0.001837  | 1.380698 | 1.841311 | 1.769464 | 0.330443 | 0.54385  | 0.930523 |
| PKD1P6     | -1.150405 | 1.37E-08  | 7.03605  | 6.190268 | 4.828073 | 2.56557  | 2.995269 | 2.60659  |
| AC138392.1 | -1.183535 | 8.91E-21  | 25.16539 | 29.73901 | 27.98247 | 10.74236 | 12.07911 | 11.99225 |
| CCDC57     | -1.086305 | 6.47E-14  | 8.616041 | 8.920518 | 8.583301 | 4.808657 | 6.368542 | 3.215508 |
| SH3BP5-AS1 | -1.280021 | 0.009991  | 4.123406 | 2.508683 | 3.245999 | 1.792336 | 1.297695 | 1.536823 |
| MATR3      | -12.87995 | 2.99E-14  | 21.51994 | 2.601721 | 30.20624 | 0.000857 | 0        | 0        |
| IFI44L     | -1.696349 | 2.03E-50  | 8.282567 | 8.002591 | 8.322689 | 1.995564 | 2.460236 | 2.641598 |
| TWF1P1     | -1.405984 | 0.000132  | 3.710658 | 2.874393 | 3.613472 | 1.52278  | 1.450681 | 0.681962 |
| HSF4       | -1.156991 | 4.26E-06  | 4.938267 | 4.413867 | 4.947498 | 2.213269 | 1.628307 | 2.533648 |
| ACP7       | -1.241427 | 7.21E-05  | 2.2937   | 2.811322 | 2.871536 | 1.675587 | 0.65098  | 0.782124 |
| NOTCH2NLC  | -1.419906 | 0.001182  | 0.629292 | 2.701829 | 1.052442 | 0.582087 | 0.191322 | 1.052282 |
| HERC2P2    | -1.658581 | 6.29E-74  | 9.541105 | 9.904538 | 8.906081 | 2.691425 | 2.599517 | 2.557306 |
| ADAMTS15   | -1.679994 | 1.44E-35  | 4.254077 | 4.017852 | 3.90846  | 1.291721 | 1.240157 | 1.084372 |
| OAS3       | -1.445158 | 3.06E-22  | 4.900688 | 4.355315 | 4.39866  | 2.225762 | 1.516138 | 2.094079 |
| TNFSF10    | -1.172985 | 0.008995  | 0.761709 | 1.484102 | 1.160012 | 0.588603 | 0.472238 | 0.36526  |
| RPS11P5    | -1.133498 | 0.002243  | 5.292774 | 5.323661 | 4.89349  | 2.65687  | 1.66787  | 2.33813  |
| ITGA4      | -1.065371 | 1.69E-32  | 8.59103  | 10.22574 | 8.889431 | 4.107532 | 4.333888 | 4.153203 |
| STARD4-AS1 | -1.846909 | 3.12E-11  | 6.048561 | 3.332992 | 1.538851 | 0.778435 | 1.035372 | 0.781714 |
| CHRD1      | -1.272373 | 6.87E-185 | 79.85338 | 85.57259 | 81.67447 | 33.31504 | 32.75237 | 31.23233 |
| GRAMD1C    | -1.141741 | 0.000914  | 0.948208 | 1.858978 | 1.721623 | 0.337106 | 0.550138 | 0.536149 |
| RAB27B     | -1.275102 | 2.75E-57  | 13.78029 | 14.23066 | 12.6233  | 4.582468 | 4.755726 | 5.519207 |
| SPP1       | -2.713277 | 8.11E-97  | 21.74036 | 19.47142 | 19.216   | 3.200808 | 2.599247 | 2.96578  |
| HEPH       | -1.323405 | 2.43E-81  | 23.35594 | 23.52814 | 23.60033 | 8.878911 | 7.920157 | 8.214958 |
| ACAN       | -2.292406 | 3.49E-42  | 3.56279  | 3.223473 | 2.860971 | 0.634681 | 0.785598 | 0.541647 |
| TMEM132B   | -1.540028 | 2.40E-21  | 2.327992 | 1.877836 | 1.707574 | 0.767714 | 0.628674 | 0.572953 |
| SCHIP1     | -3.447025 | 2.22E-28  | 7.014053 | 5.972177 | 4.917637 | 0.089622 | 0.268878 | 0.147408 |
| POM121L9P  | -2.035837 | 5.80E-33  | 3.832545 | 3.195252 | 3.142023 | 1.012111 | 0.679615 | 0.73603  |
| TCAF1P1    | -1.983724 | 2.20E-22  | 6.431324 | 6.476717 | 6.021304 | 1.98425  | 1.212175 | 1.341689 |
| ZFP62      | -1.066771 | 3.20E-11  | 4.074002 | 6.460501 | 3.982925 | 3.143139 | 1.880374 | 1.550279 |
| AL031282.1 | -1.05494  | 1.49E-05  | 4.087757 | 2.975044 | 3.541332 | 1.398672 | 1.585251 | 1.38413  |
| CICP14     | -2.075148 | 1.79E-09  | 1.598576 | 1.217905 | 1.324162 | 0.274289 | 0.271304 | 0.383623 |
| HOXA6      | -1.451515 | 0.00562   | 1.247268 | 1.814353 | 1.611703 | 0.773732 | 0.586643 | 0.284153 |
| ZFH2-AS1   | -1.622797 | 1.77E-05  | 1.510093 | 1.227008 | 1.455785 | 0.290319 | 0.3738   | 0.630016 |
| PDXDC2P-N  | -1.387087 | 1.98E-19  | 5.842941 | 5.901438 | 5.448857 | 1.580176 | 2.131543 | 1.817634 |
| HERC2P3    | -1.253823 | 5.68E-05  | 2.017387 | 1.535154 | 1.483377 | 0.561949 | 0.299287 | 0.286516 |
| CADPS2     | -1.684897 | 1.33E-11  | 1.738443 | 1.438888 | 1.229009 | 0.277247 | 0.340121 | 0.536003 |
| RPL37P2    | -1.115762 | 0.006529  | 7.43542  | 8.208483 | 9.957882 | 5.55326  | 2.738909 | 2.912222 |
| FP671120.6 | -1.18208  | 4.66E-05  | 990.4422 | 1143.496 | 1800.826 | 610.2422 | 530.5659 | 514.3701 |
| NAA16      | -1.243872 | 2.52E-09  | 2.788757 | 2.005052 | 2.509457 | 0.970815 | 1.00122  | 0.932571 |
| GEM        | -1.02955  | 1.25E-12  | 10.02296 | 12.5008  | 11.12849 | 4.838849 | 4.708026 | 6.095151 |
| AKR1B10    | -1.243712 | 8.25E-05  | 3.602906 | 3.177781 | 3.759201 | 1.366081 | 2.04844  | 0.972086 |
| BMS1P17    | -2.82036  | 0.000181  | 1.09792  | 1.260039 | 1.201945 | 0.187136 | 0.115791 | 0.138374 |
| AC008522.1 | -1.769666 | 1.56E-10  | 1.901543 | 1.621243 | 1.869831 | 0.56225  | 0.465829 | 0.447057 |
| LINC00476  | -1.056892 | 0.013259  | 1.600575 | 1.609175 | 1.466658 | 1.131336 | 0.301575 | 0.508834 |
| C7         | -1.82481  | 1.17E-42  | 4.292005 | 4.644348 | 4.477863 | 1.187694 | 1.556753 | 1.309886 |
| INMT       | -1.410033 | 4.64E-07  | 2.135854 | 3.01175  | 2.186031 | 0.942763 | 1.031224 | 0.617259 |
| THBS2      | -1.18989  | 2.31E-231 | 79.92642 | 80.63416 | 76.94801 | 31.6221  | 33.15218 | 33.93996 |
| NBPF19     | -14.06822 | 3.51E-06  | 0.00767  | 10.87059 | 7.331607 | 0        | 0        | 0        |
| SPTLC3     | -1.373988 | 1.31E-17  | 2.781066 | 2.430275 | 2.731801 | 0.888582 | 1.017567 | 0.911331 |
| SLC2A5     | -1.050523 | 2.23E-18  | 7.488764 | 6.332347 | 6.834683 | 2.980707 | 3.372053 | 2.951004 |
| GOLGA8B    | -1.613525 | 1.34E-59  | 7.588965 | 8.2066   | 8.129845 | 3.363453 | 3.077205 | 2.508058 |
| ICAM1      | -1.464727 | 4.87E-67  | 22.8694  | 24.81865 | 21.05095 | 7.959184 | 7.813704 | 7.936109 |
| AL121772.3 | -2.114016 | 0.014746  | 1.361911 | 1.189388 | 1.157206 | 0        | 0.430578 | 0.365997 |
| PKD1P3     | -1.743907 | 1.01E-52  | 6.44242  | 5.342111 | 5.331155 | 1.542961 | 1.697455 | 1.608497 |
| APOL6      | -1.061745 | 1.25E-24  | 5.199592 | 5.006223 | 4.646428 | 1.977377 | 2.221937 | 2.58164  |
| NDP        | -1.176331 | 9.03E-14  | 10.48149 | 8.19395  | 9.620765 | 3.562503 | 4.2413   | 4.293368 |

|            |           |           |          |          |          |          |          |          |
|------------|-----------|-----------|----------|----------|----------|----------|----------|----------|
| URAHP      | -1.490682 | 0.01017   | 0.753486 | 0.900786 | 1.50456  | 0.281943 | 0.600612 | 0.200087 |
| SLC25A27   | -1.456655 | 4.16E-05  | 2.02392  | 1.728874 | 1.902557 | 0.598502 | 0.67676  | 0.334066 |
| LINC01881  | -1.200138 | 0.00319   | 2.766297 | 2.827105 | 1.571649 | 0.758382 | 1.215317 | 0.936841 |
| SUCLG2-AS1 | -1.092447 | 0.00625   | 1.860236 | 1.50704  | 0.604308 | 0.583408 | 0.739058 | 0.474715 |
| NETO2      | -1.039693 | 3.69E-212 | 107.2095 | 101.624  | 97.68205 | 44.09134 | 41.22118 | 48.5941  |
| ARHGAP28   | -1.17946  | 7.60E-05  | 1.162994 | 1.504494 | 1.061761 | 0.539107 | 0.297533 | 0.728567 |
| SNED1      | -1.682923 | 1.39E-195 | 21.84461 | 24.0909  | 22.90897 | 7.802725 | 7.117867 | 6.6759   |
| AC004263.2 | -2.5395   | 1.07E-12  | 1.655581 | 1.485651 | 1.668379 | 0.222114 | 0.31823  | 0.233874 |
| VIM-AS1    | -3.286122 | 0.005786  | 26.31227 | 124.2058 | 2.670853 | 3.806982 | 4.516008 | 3.947224 |
| NCAM2      | -1.12901  | 3.88E-07  | 1.474455 | 1.834634 | 1.471592 | 0.497641 | 0.516478 | 0.869254 |
| GSAP       | -1.016167 | 4.25E-11  | 6.315519 | 5.025555 | 6.38154  | 2.854072 | 3.242786 | 2.8049   |
| MYLIP      | -1.205319 | 3.50E-09  | 2.537359 | 3.019315 | 3.203917 | 1.145101 | 1.179887 | 1.296514 |
| PTGS1      | -1.010081 | 2.08E-26  | 9.969736 | 9.466087 | 9.410609 | 4.384097 | 5.359414 | 4.467984 |
| NPIP14P    | -1.705388 | 0.000989  | 1.068393 | 1.592765 | 2.191239 | 0.382993 | 0.556786 | 0.579903 |
| CCDC102B   | -1.288506 | 1.39E-07  | 3.044873 | 4.229696 | 4.049054 | 1.962152 | 1.487775 | 1.348108 |
| LY75       | -2.01929  | 4.07E-11  | 1.022687 | 0.78166  | 1.251943 | 0.243958 | 0.125852 | 0.351673 |
| AC022384.1 | -3.07693  | 8.85E-07  | 0.517527 | 2.024071 | 0.987294 | 0.100161 | 0.038425 | 0.300357 |
| AP006623.1 | -1.025666 | 0.016071  | 0.994725 | 1.205355 | 0.998176 | 0.3011   | 0.45739  | 0.725458 |
| MXRA5      | -1.181867 | 6.57E-14  | 1.471899 | 1.393915 | 1.310332 | 0.607509 | 0.579876 | 0.566027 |
| AC159540.2 | -1.029021 | 4.59E-07  | 3.189069 | 2.870376 | 3.144767 | 1.073288 | 1.552311 | 1.785736 |
| AC079298.3 | -1.781079 | 3.37E-22  | 6.349975 | 6.156616 | 8.306534 | 2.47389  | 2.576052 | 2.475638 |
| SCD        | -1.861716 | 0         | 87.18168 | 84.95033 | 83.79737 | 21.48618 | 21.66033 | 23.97346 |
| AKR1C3     | -1.091511 | 1.65E-57  | 72.90846 | 69.43465 | 67.41859 | 29.97356 | 31.02908 | 32.65722 |
| ARRDC4     | -1.007507 | 3.31E-151 | 75.56601 | 74.10794 | 71.95905 | 34.58143 | 35.89357 | 34.5892  |
| LAMA2      | -1.148518 | 5.77E-26  | 4.654256 | 4.50903  | 4.247859 | 2.111073 | 2.013542 | 1.635571 |
| RSKR       | -1.207097 | 0.001143  | 1.361627 | 1.859586 | 1.417018 | 0.868383 | 0.529453 | 0.425877 |
| AL356515.1 | -3.087209 | 0.010871  | 1.087564 | 1.290236 | 1.249165 | 0        | 0.391447 | 0        |
| AL732372.2 | -1.62896  | 0.00225   | 2.364943 | 1.983864 | 1.930509 | 0.37525  | 0.577126 | 0.663142 |
| EIF4BP6    | -1.091736 | 0.000424  | 2.420167 | 2.041047 | 3.064151 | 0.922775 | 0.944244 | 1.501187 |
| SOHLH2     | -1.561036 | 0.000264  | 1.36459  | 1.262586 | 0.856156 | 0.376707 | 0.50562  | 0.238262 |
| MT-TY      | -1.019731 | 3.91E-173 | 4642.016 | 4703.992 | 4638.441 | 2210.244 | 2184.952 | 2178.55  |
| SLC6A6     | -1.118987 | 2.08E-48  | 10.06578 | 10.09306 | 9.300053 | 4.772617 | 4.489254 | 4.764011 |
| RAPH1      | -1.226852 | 1.76E-21  | 4.264249 | 6.717338 | 4.056131 | 2.384488 | 1.531858 | 2.658591 |
| AC018665.1 | -1.250323 | 0.005829  | 1.747767 | 1.277516 | 1.226203 | 0.721282 | 0.333393 | 0.64142  |
| STMN2      | -1.008058 | 1.73E-28  | 31.31091 | 34.44612 | 39.22556 | 15.74694 | 17.09925 | 16.19559 |
| AC079949.2 | -1.340984 | 2.80E-12  | 4.412098 | 4.095181 | 3.404969 | 1.319552 | 1.710519 | 1.443816 |
| SETD5      | -1.200077 | 4.74E-31  | 15.49973 | 15.11028 | 16.20785 | 6.815456 | 7.41056  | 6.886571 |
| PARGP1     | -1.579307 | 0.001807  | 0.916163 | 1.174966 | 1.343211 | 0.358331 | 0.486564 | 0.515863 |
| CCL20      | -1.043207 | 4.34E-08  | 13.47241 | 13.96061 | 14.05101 | 6.022859 | 5.714935 | 8.409226 |
| ZNF169     | -1.655775 | 0.001681  | 1.537323 | 1.309097 | 1.306514 | 0.386606 | 0.075941 | 0.697275 |
| TBC1D3D    | -1.397773 | 0.000519  | 4.876391 | 2.196458 | 1.347177 | 1.218517 | 1.159401 | 0.642742 |
| CPA6       | -1.767175 | 0.000443  | 1.250372 | 1.024282 | 0.783606 | 0.118488 | 0.383502 | 0.348407 |
